# Supplementary material for: Differential selection on gene translation efficiency between the filamentous fungus Ashbya gossypii and yeasts
Source: PubMed Central journal article supplement (PMC2632675; doi:10.1186/1471-2148-8-343), 2008-12-29
Supplement: 1471-2148-8-343-S1.pdf [file 1471-2148-8-343-S1.pdf]

# Additional file 1

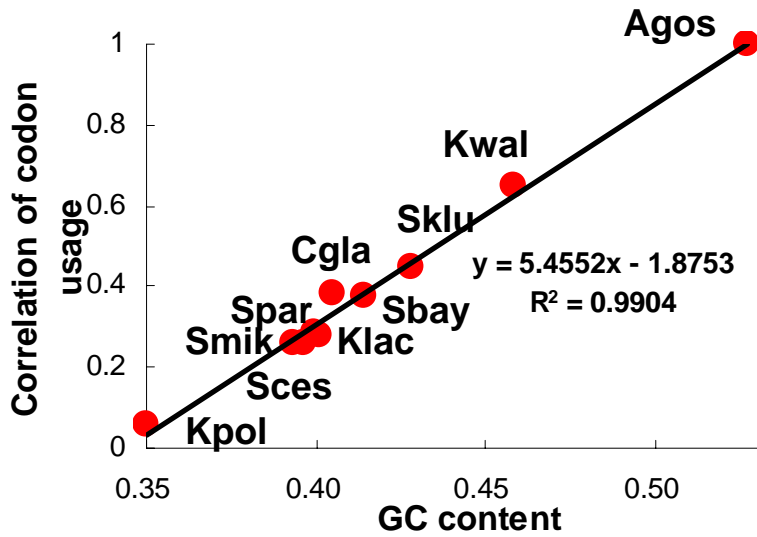

**A**

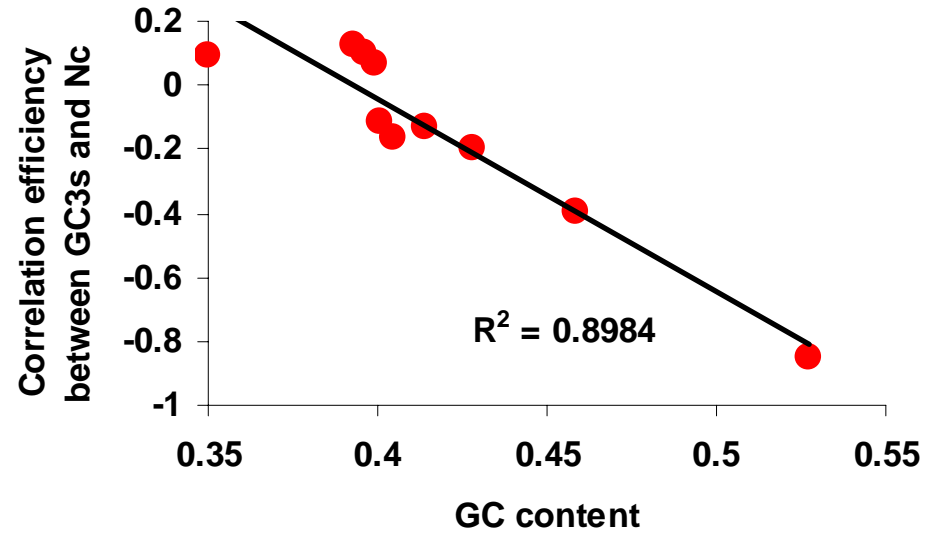

**B**

**C**

| Pearson Correlation | TAI   | CAI   | GC3s    | Nc       |
|---------------------|-------|-------|---------|----------|
| TAI                 |       | 0     | 1.6E-29 | 2.2E-161 |
| CAI                 | 0.90  |       | 2.2E-62 | 7.5E-285 |
| GC3s                | 0.16  | 0.24  |         | 0        |
| Nc                  | -0.38 | -0.49 | -0.85   |          |
