# Supplementary material for: Differential selection on gene translation efficiency between the filamentous fungus Ashbya gossypii and yeasts
Source: PubMed Central journal article supplement (PMC2632675; doi:10.1186/1471-2148-8-343), 2008-12-29

# Additional file 2

Agos Klac Sklu Kwal Kpol Cgla Sbay Smik Spar Sces

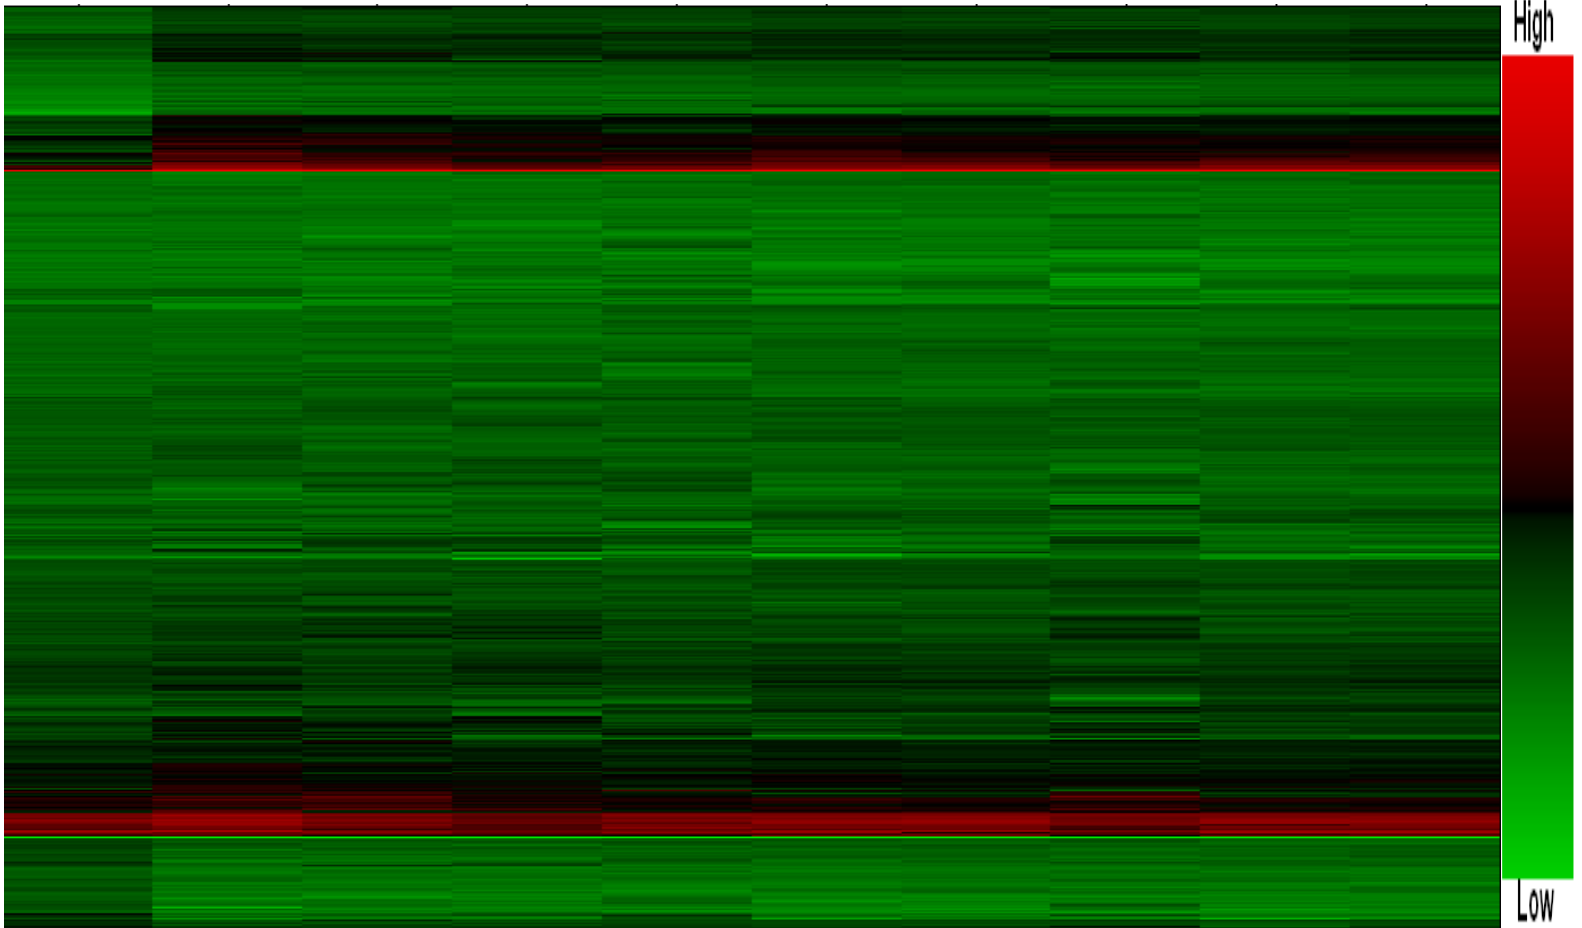

Supplement: 1471-2148-8-343-S2.pdf [file 1471-2148-8-343-S2.pdf]
